# Supplementary material for: The Ultrasound-Assisted Extraction of Polyphenols from Mexican Firecracker (Hamelia patens Jacq.): Evaluation of Bioactivities and Identification of Phytochemicals by HPLC-ESI-MS
Source: MDPI journal article supplement (doi:10.3390/molecules27248845), 2022-12-13
Supplement: s1 [file s1]

**A)**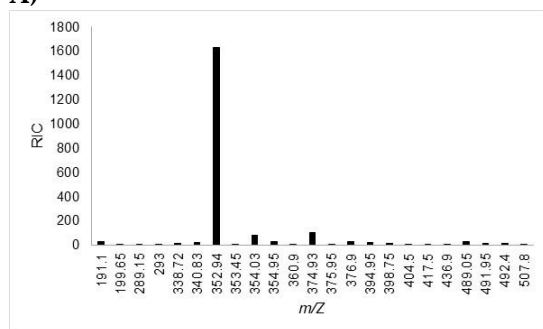**B)**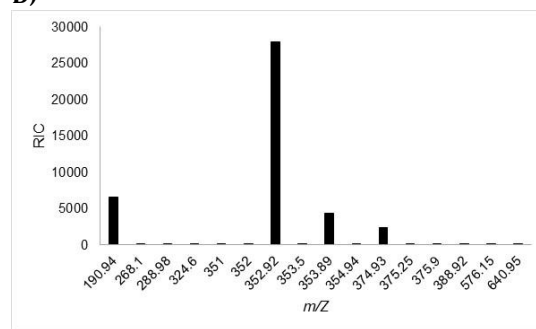**C)**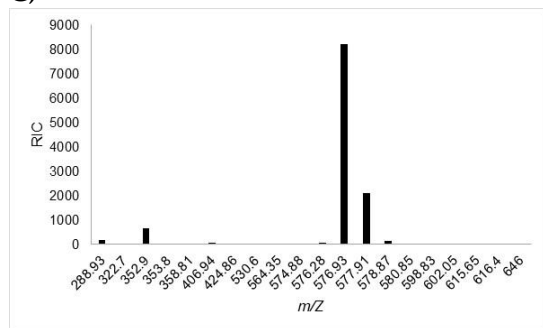**D)**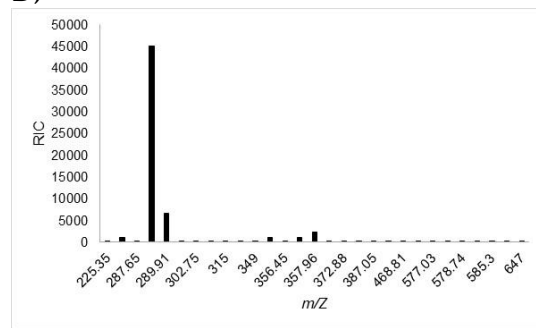**E)**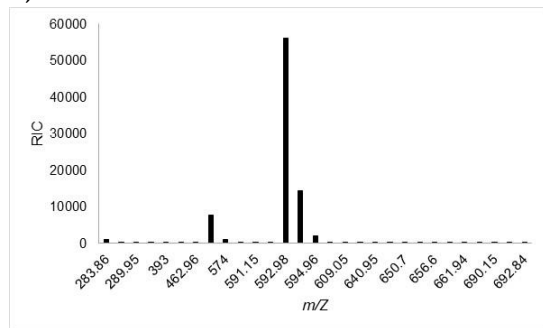**F)**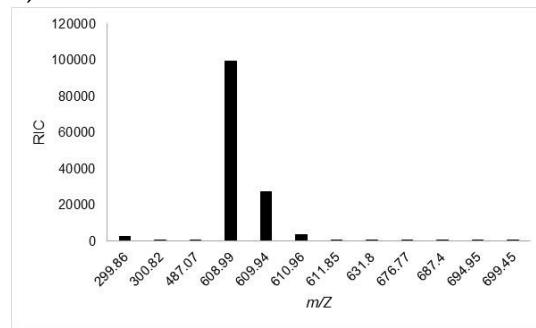**G)**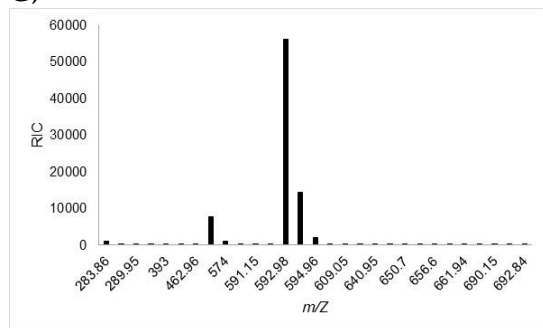**H)**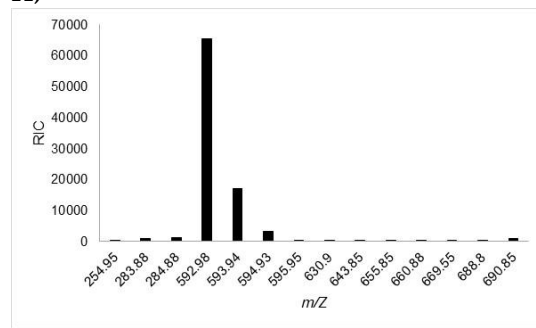**I)****J)**

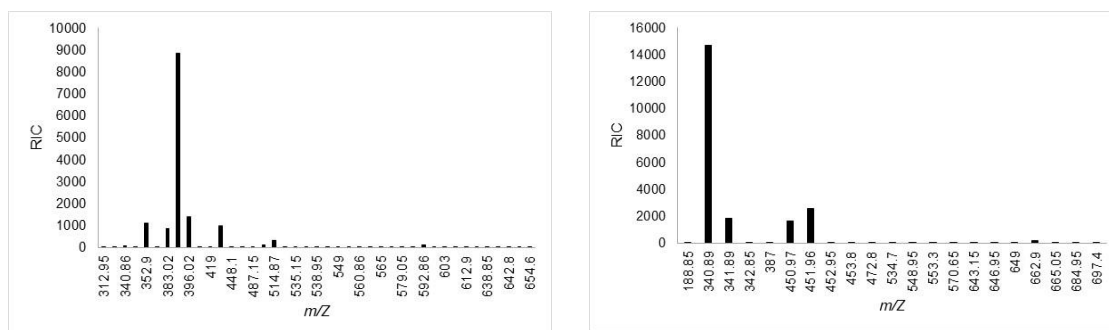

**Figure S1.** Mass spectrum of identified compounds. (A,B) are Scopoletin-7-*O*-glucoside isomer, (C,E) Cat-(E)Cat (Epicatechin), (D) (Epi) Catechin, (E,G) Apigenin-6,8-*C*-di-glucoside (Vicenin II), (F) Quercetin-deoxyhexosyl-hexoside, (H) Kaempferol-3-*O*-rutinoside, (I) Unknown, (J) Caffeic acid-*O*-glucoside.
